# Supplementary figures and images for: Heterogeneity in the Response of Different Subtypes of Drosophila melanogaster Midgut Cells to Viral Infections
Source: MDPI journal article supplement (doi:10.3390/v13112284), 2021-11-15

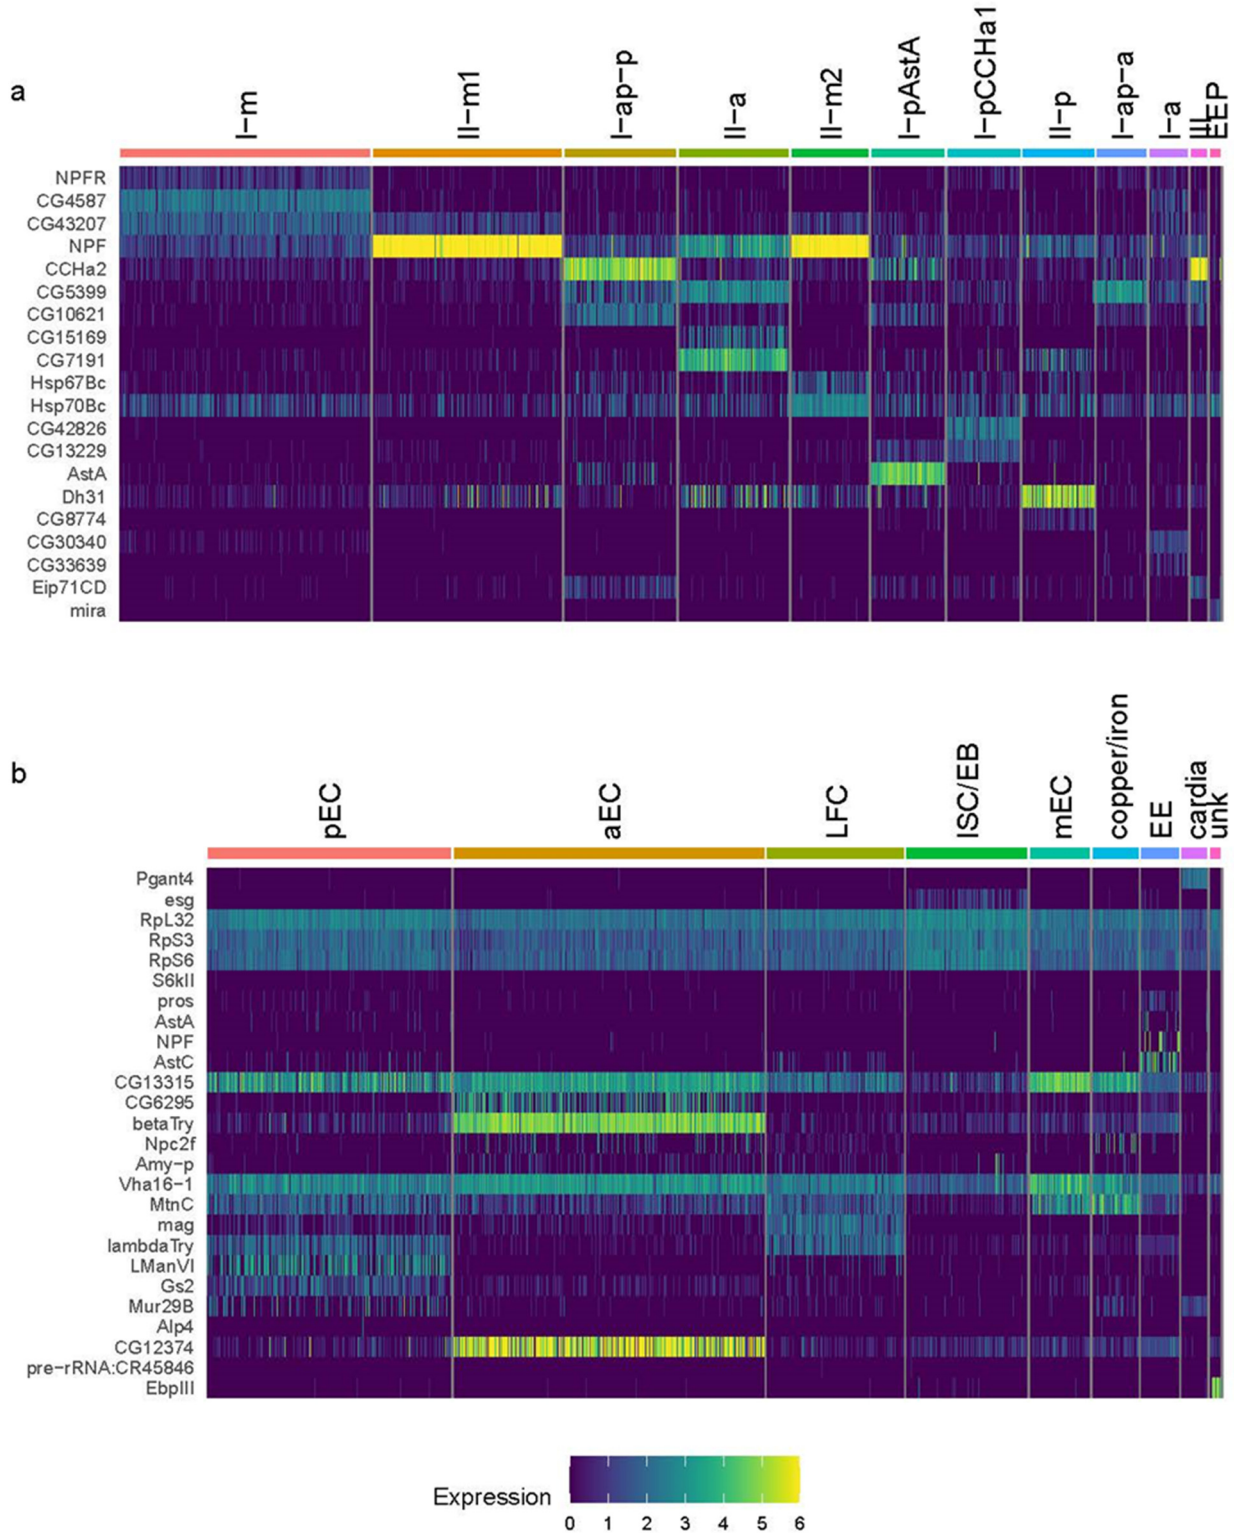

**Figure S1.** marker genes used to identify clusters on the (a) EE dataset and (b) midgut atlas dataset.

Supplement: s1 [file s1]
